# Supplementary material
Source: publisher figshare collection journal article supplement (https://tandf.figshare.com/articles/dataset/_/25211268)
Supplement: Supplementary file 1 [file 1]

THE GEOLOGY OF SIERRA CALDERONA  
(SE IBERIAN CORDILLERA, SPAIN),  
A REVIEW:  
RESULTS OF A NEW  
1:25.000 SCALE GEOLOGICAL MAP  
GEOLOGICAL CROSS SECTIONS OF THE SOUTHERN  
SECTOR OF SIERRA CALDERONA

Hernaiz-Huerta P.P.  
CN IGME\_CSIC / Spanish Geological Survey

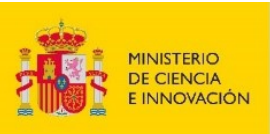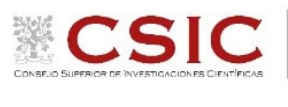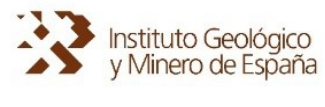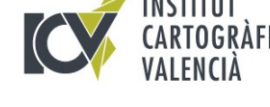

LEGEND

| PÉR MIA.         | TRIÁSSIC | JURÁSSIC  | NEÓGEN. |          | QUATERN.            |          |        |       |      |            |              |           |           |           |          |          |          |                |            |            |
|------------------|----------|-----------|---------|----------|---------------------|----------|--------|-------|------|------------|--------------|-----------|-----------|-----------|----------|----------|----------|----------------|------------|------------|
|                  |          |           | MIocene | PLIOCENE | PLEISTOC.           | HOLOCENE |        |       |      |            |              |           |           |           |          |          |          |                |            |            |
|                  |          |           |         |          |                     | UPPER    | MIDDLE | LOWER |      |            |              |           |           |           |          |          |          |                |            |            |
| LOPIN GUAD ALUP. | LADINIAN | OLENEKIAN | ANISIAN | TORTON   | VALLESIAN ARAGONIAN | TUROLIAN | Q tz   | Q cd  | Q i  |            |              |           |           |           |          |          |          |                |            |            |
|                  |          |           |         |          |                     |          |        |       |      | TITTHONIAN | KIMMERIDGIAN | OXFORDIAN | CALLOVIAN | BATHONIAN | BAJOCIAN | AALENIAN | TOARCIAN | PLIENSCHACHIAN | SINEMURIAN | HETTANGIAN |
| J Lr             | J Ch     | J Tm      | J Cl    | J Ct     | J Im                | M Go     | M To   | P To  | M Al |            |              |           |           |           |          |          |          |                |            |            |
