# Supplementary material
Source: publisher figshare collection journal article supplement (https://tandf.figshare.com/articles/dataset/_/25211268)
Supplement: Supplementary file 2 [file 1]

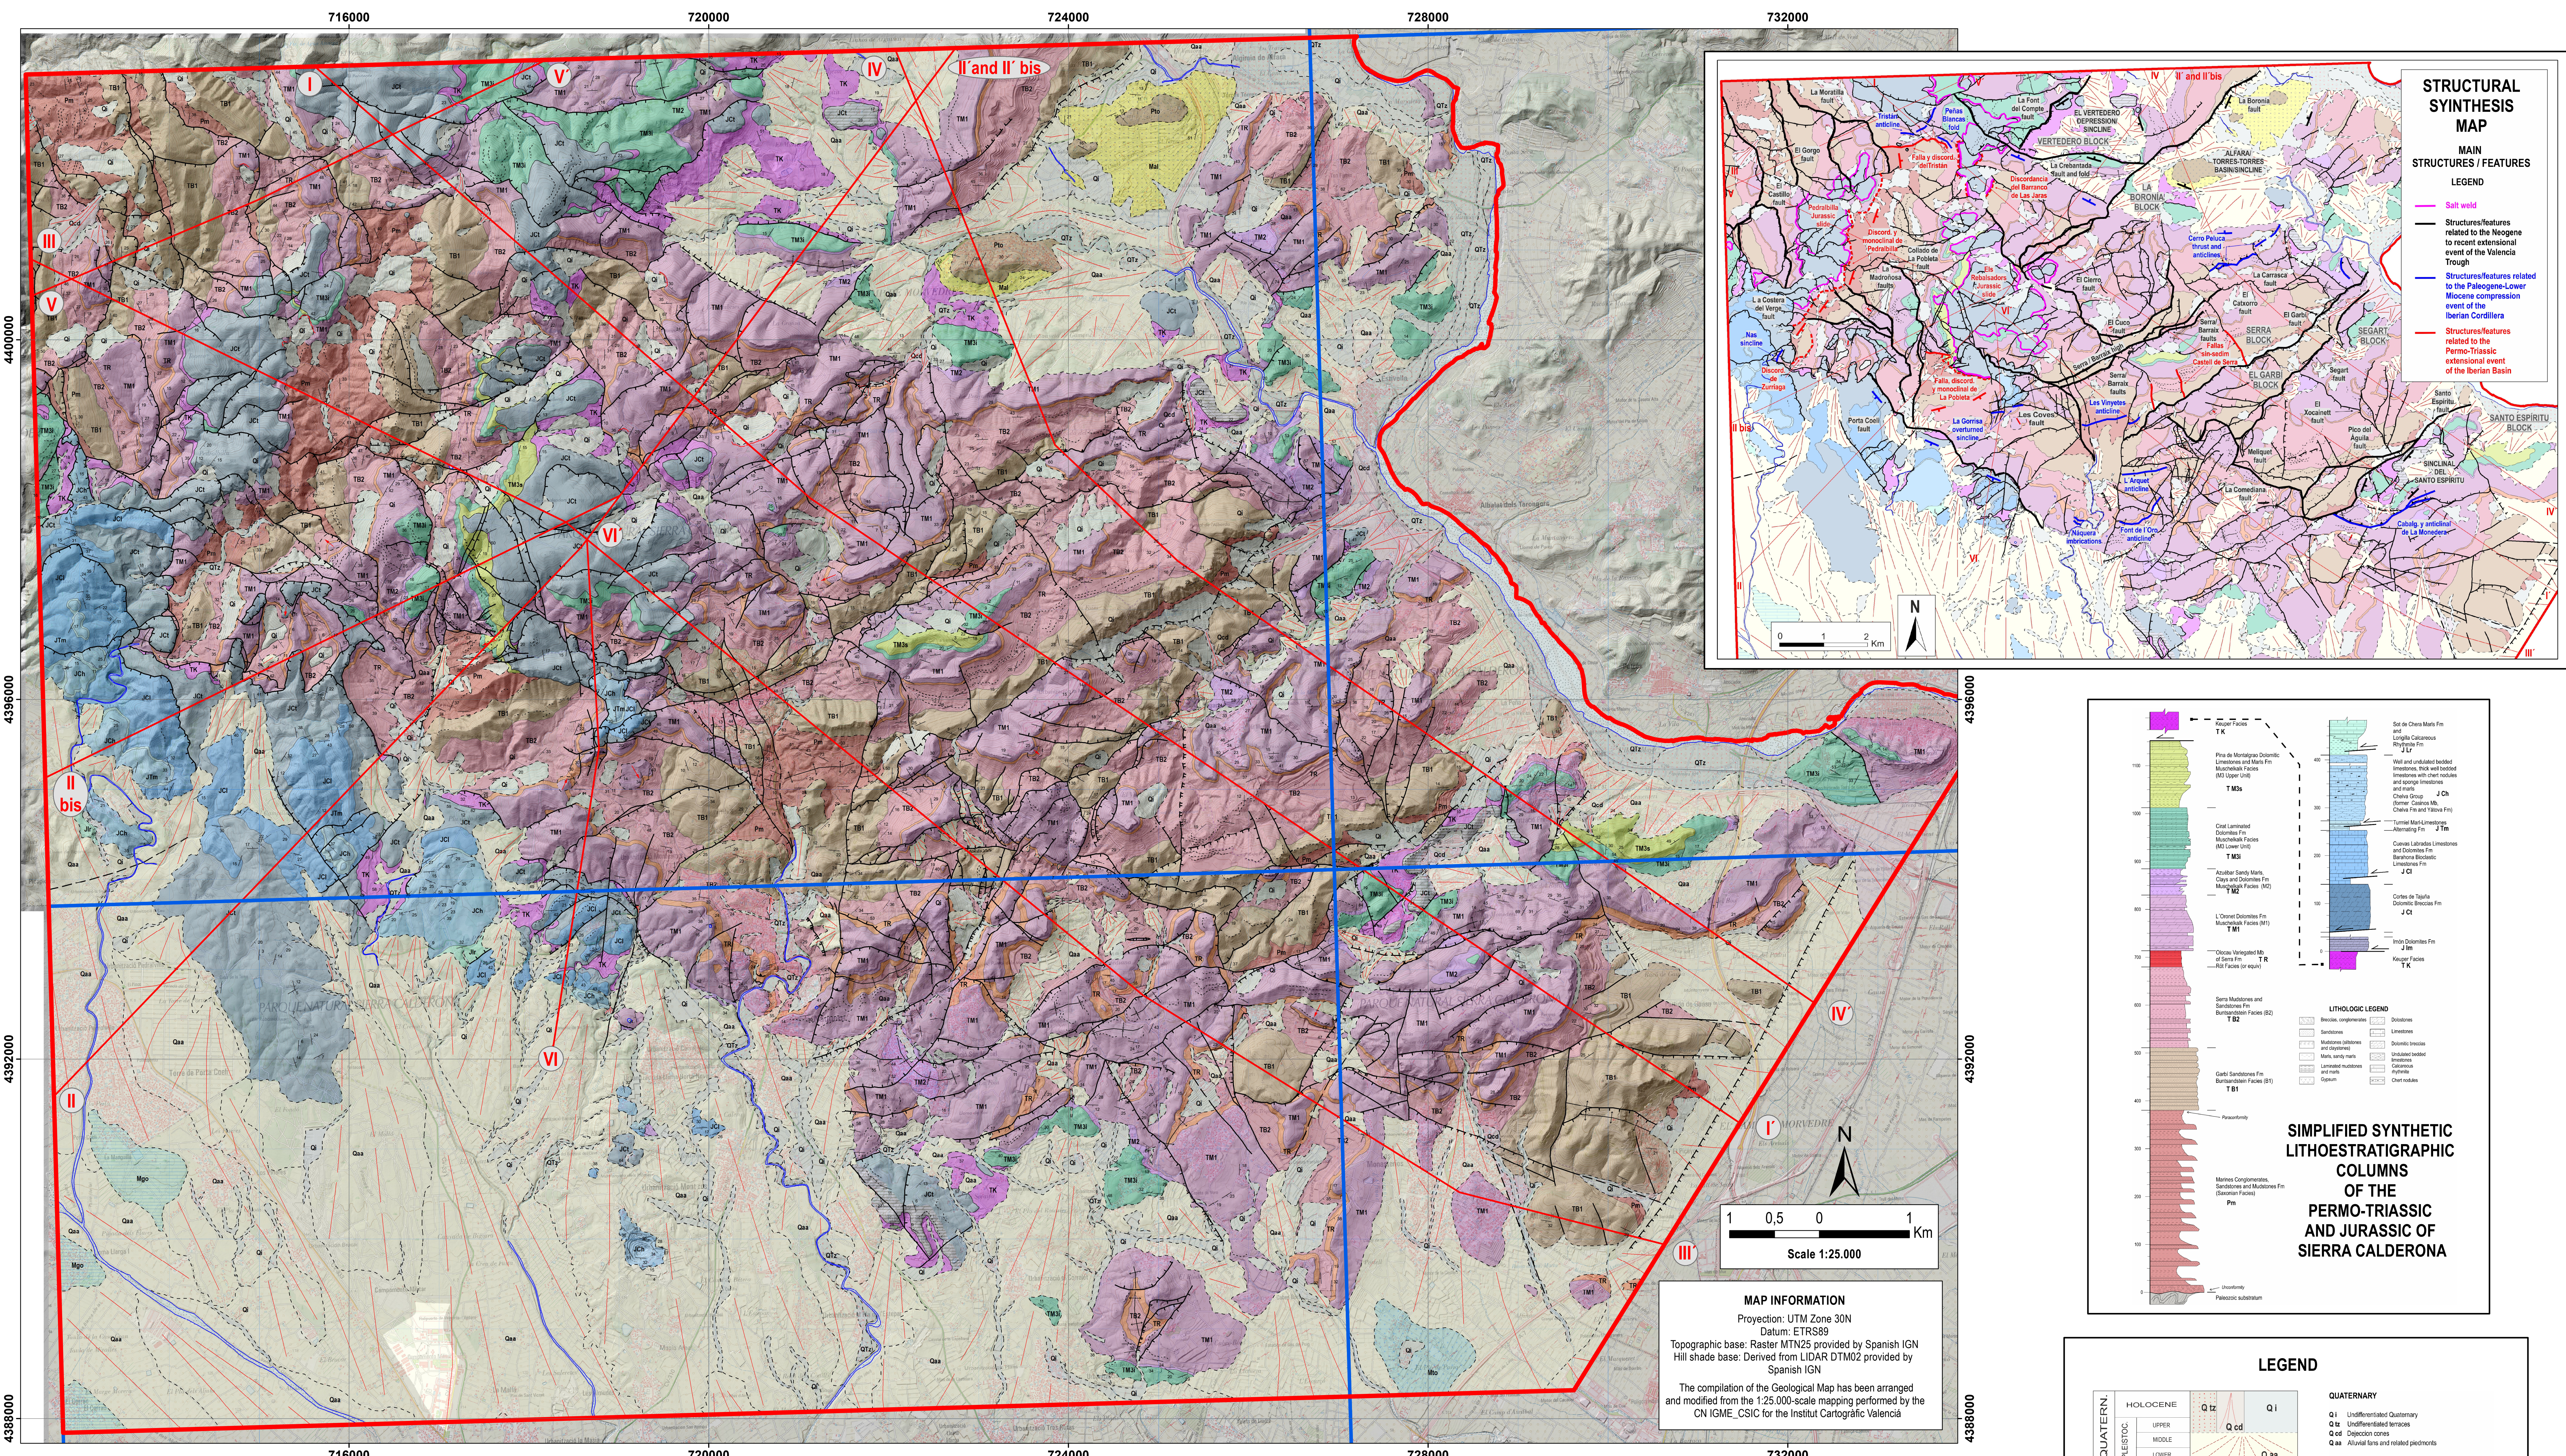

**STRUCTURAL SYNTHESIS MAP**  
**MAIN STRUCTURES / FEATURES**

**LEGEND**

- Salt weld
- Structures/features related to the Neogene to recent extensional event of the Valencia Trough
- Structures/features related to the Paleogene-Lower Miocene compression event of the Iberian Cordillera
- Structures/features related to the Permo-Triassic extensional event of the Iberian Basin

**MAP INFORMATION**  
Projection: UTM Zone 30N  
Datum: ETRS89  
Topographic base: Raster MTN25 provided by Spanish IGN  
Hill shade base: Derived from LIDAR DTM02 provided by Spanish IGN  
The compilation of the Geological Map has been arranged and modified from the 1:25,000-scale mapping performed by the CN IGME\_CSIC for the Institut Cartogràfic de València

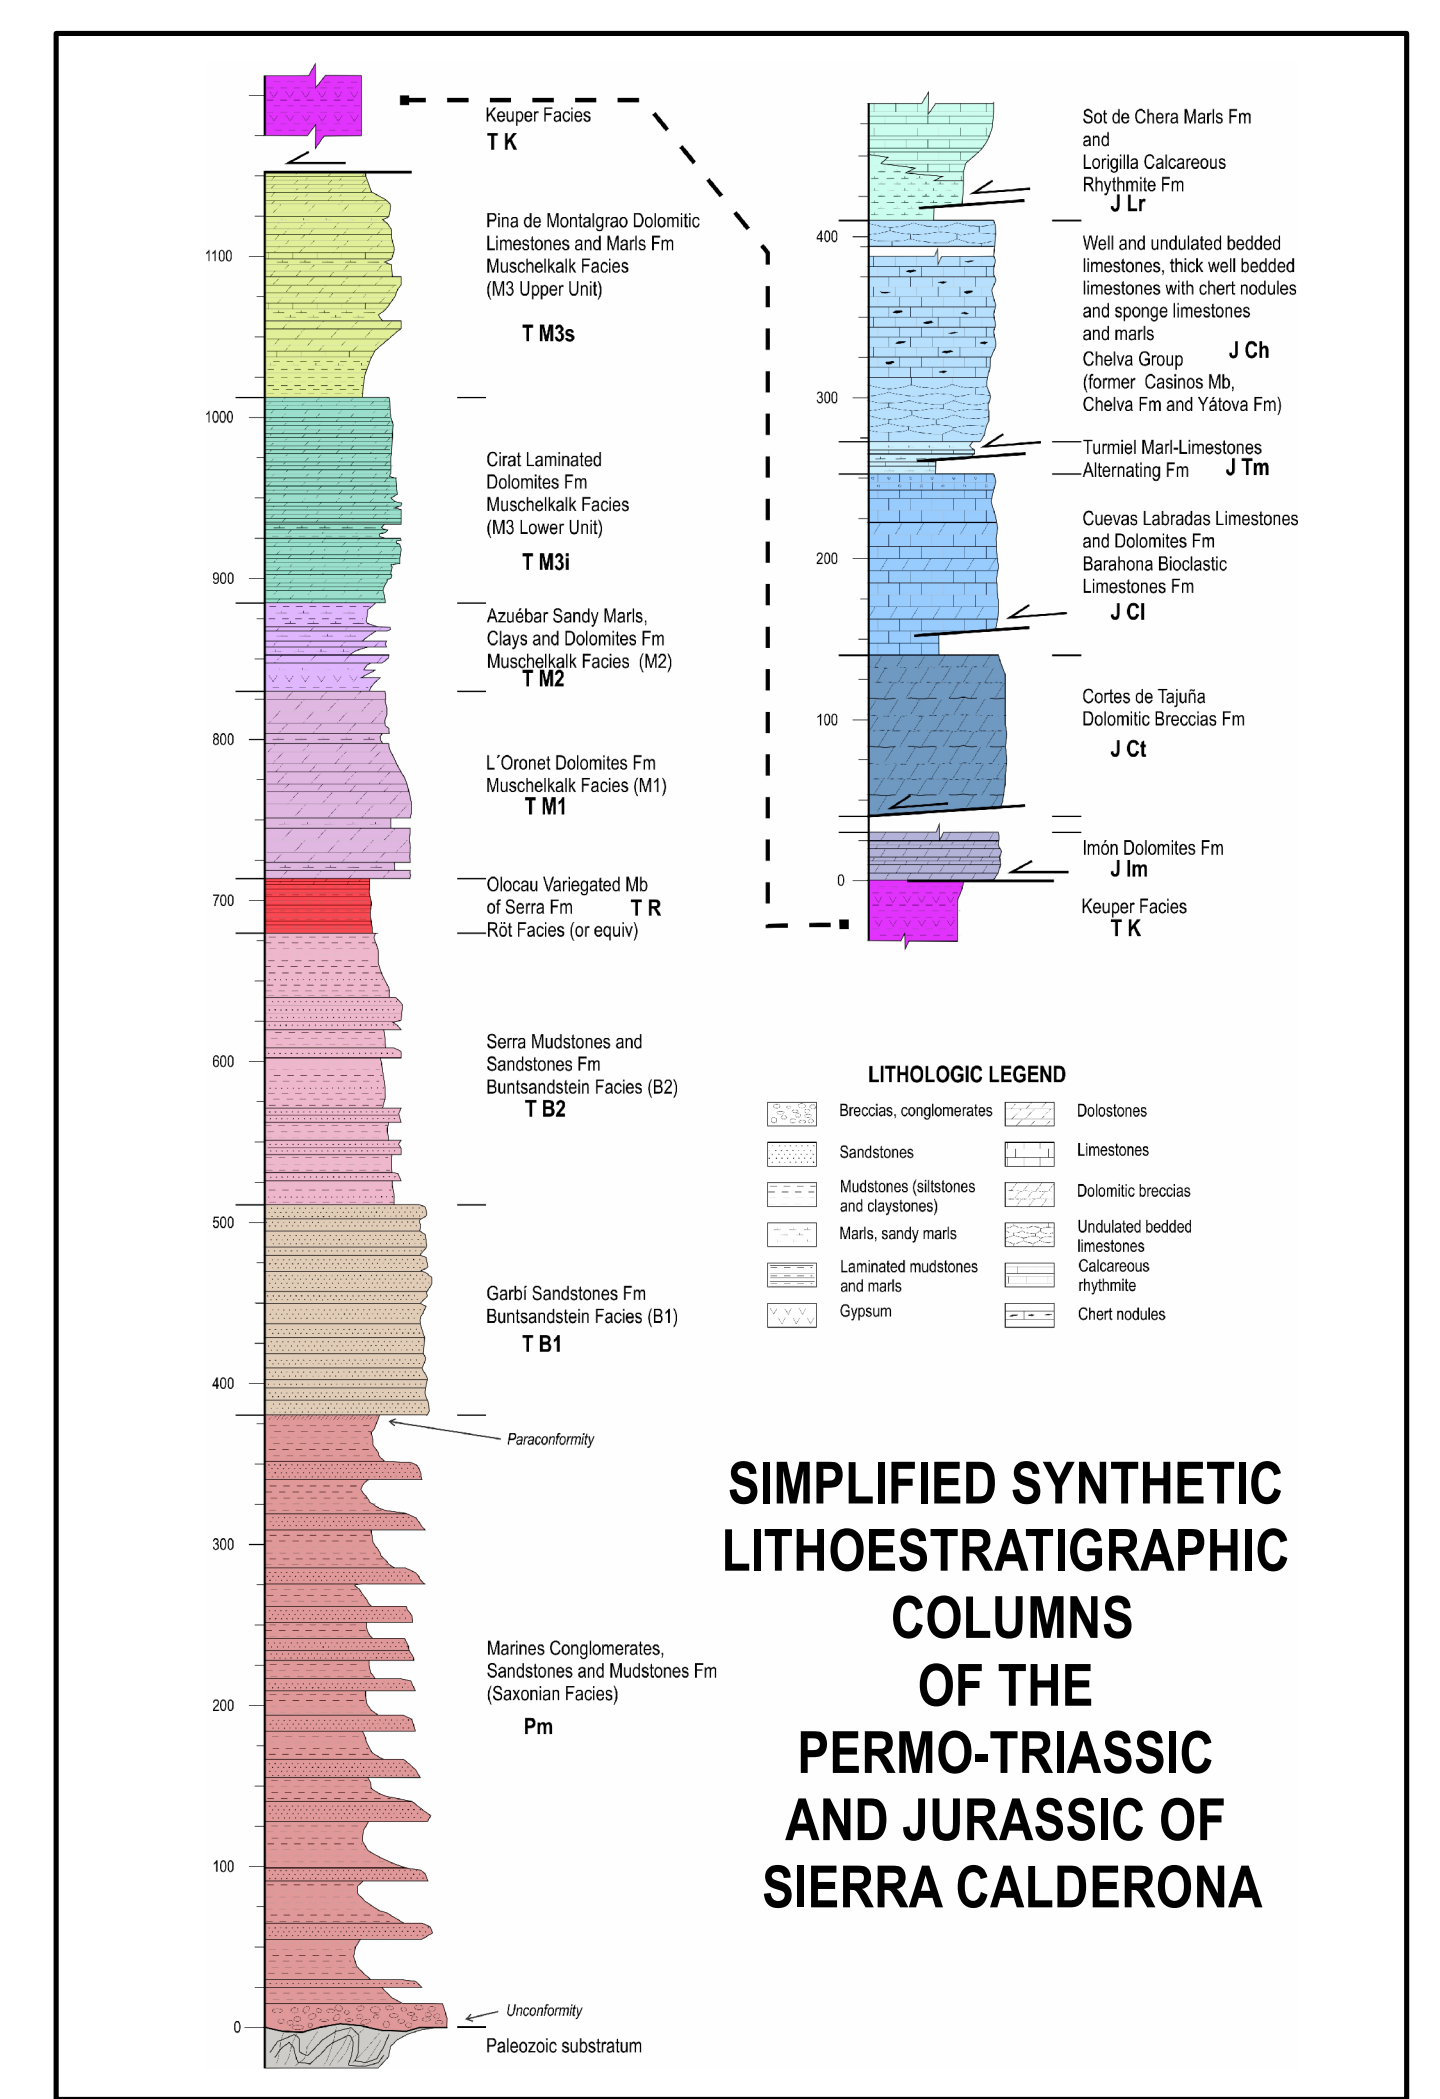

**LEGEND**

| PERMIAN  | TRIASSIC | JURASSIC | NEOGENE | QUATERNARY  |
|----------|----------|----------|---------|-------------|
| OPINIAN  | UPPER    | UPPER    | UPPER   | HOLOCENE    |
| GUADALUP | MIDDLE   | MIDDLE   | MIDDLE  | PLEISTOCENE |
| ARTURIAN | LOWER    | LOWER    | LOWER   | LOWER       |

**QUATERNARY**

- Q<sub>tz</sub> Undifferentiated Quaternary
- Q<sub>cd</sub> Undifferentiated terrace
- Q<sub>cd</sub> Deposition cones
- Q<sub>ae</sub> Alluvial fans and related piedmonts

**NEOGENE**

- Alfama-Torres Torres Basin
- P<sub>to</sub> El Tochar Conglomerates
- M<sub>ai</sub> Alfama-Torres Torres Marls and Sandstones

**Southern Sector (Burjassot)**

- M<sub>Go</sub> Massive lacustrine (limestones, Godelia Fm)
- M<sub>To</sub> Marls and sandstones, Torrel Fm

**MESOZOIC**

- J<sub>Lr</sub> Sol de Chera Marls Fm and Longuilla Calcareous Rhyolite Fm
- J<sub>Ch</sub> Well and undulated bedded limestones, thick well-bedded limestones with chert nodules and sponge limestones and marls
- J<sub>Tm</sub> Chelva Group (former Castanos Mb, Chelva Fm and Torrel Fm)
- J<sub>Cl</sub> Torrel Marls Limestones Alternating Fm
- J<sub>Cl</sub> Cuevas Labradas Limestones and Dolomites Fm and Barahona Bioclastic Limestones Fm
- J<sub>Cl</sub> Imbr. Dolomites at the bottom and Cortes de Tajalla Dolomites Beccas Fm. Eventually, undifferentiated Lower Jurassic (J<sub>Imbr</sub> Ch<sub>Cl</sub> Q<sub>Units</sub>)
- J<sub>Im</sub> Imbr. Dolomites
- T<sub>of</sub> Optines. Basic intrusive rocks in Kuiper Facies.
- T<sub>K</sub> Undifferentiated Valencia Group (Kuiper Facies)
- T<sub>M3s</sub> Pias de Montargao Dolomites Limestones and Marls Fm (Maschkaik Facies -M3 Upper Unit-)
- T<sub>M3i</sub> Grail Laminated Dolomites Fm (Maschkaik Facies -M3 Lower Unit-)
- T<sub>M2</sub> Grail Laminated Dolomites Fm (Maschkaik Facies -M2-)
- T<sub>M1</sub> Grail Laminated Dolomites Fm (Maschkaik Facies -M1-)
- T<sub>B2</sub> L. Ornel Dolomites Fm (Maschkaik Facies -B2-)
- T<sub>B1</sub> L. Ornel Dolomites Fm (Maschkaik Facies -B1-)
- T<sub>B1</sub> Serra Mudstones and Sandstones Fm (Burjassot Facies -B1-)
- P<sub>m</sub> Marls conglomerates, sandstones and mudstones Fm (Saxanian Facies)

# THE GEOLOGY OF SIERRA CALDERONA (SE IBERIAN CORDILLERA, SPAIN), A REVIEW: RESULTS OF A NEW 1:25.000 SCALE GEOLOGICAL MAP GEOLOGICAL MAP OF THE SOUTHERN SECTOR OF SIERRA CALDERONA

Hernaiz-Huerta P.P., Díaz de Neira, J.A., Mink, S. (SIG) CN IGME\_CSIC / Spanish Geological Survey

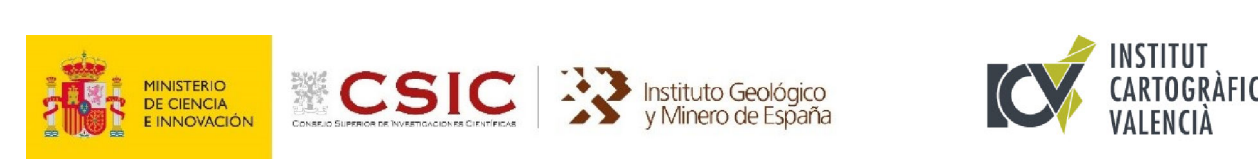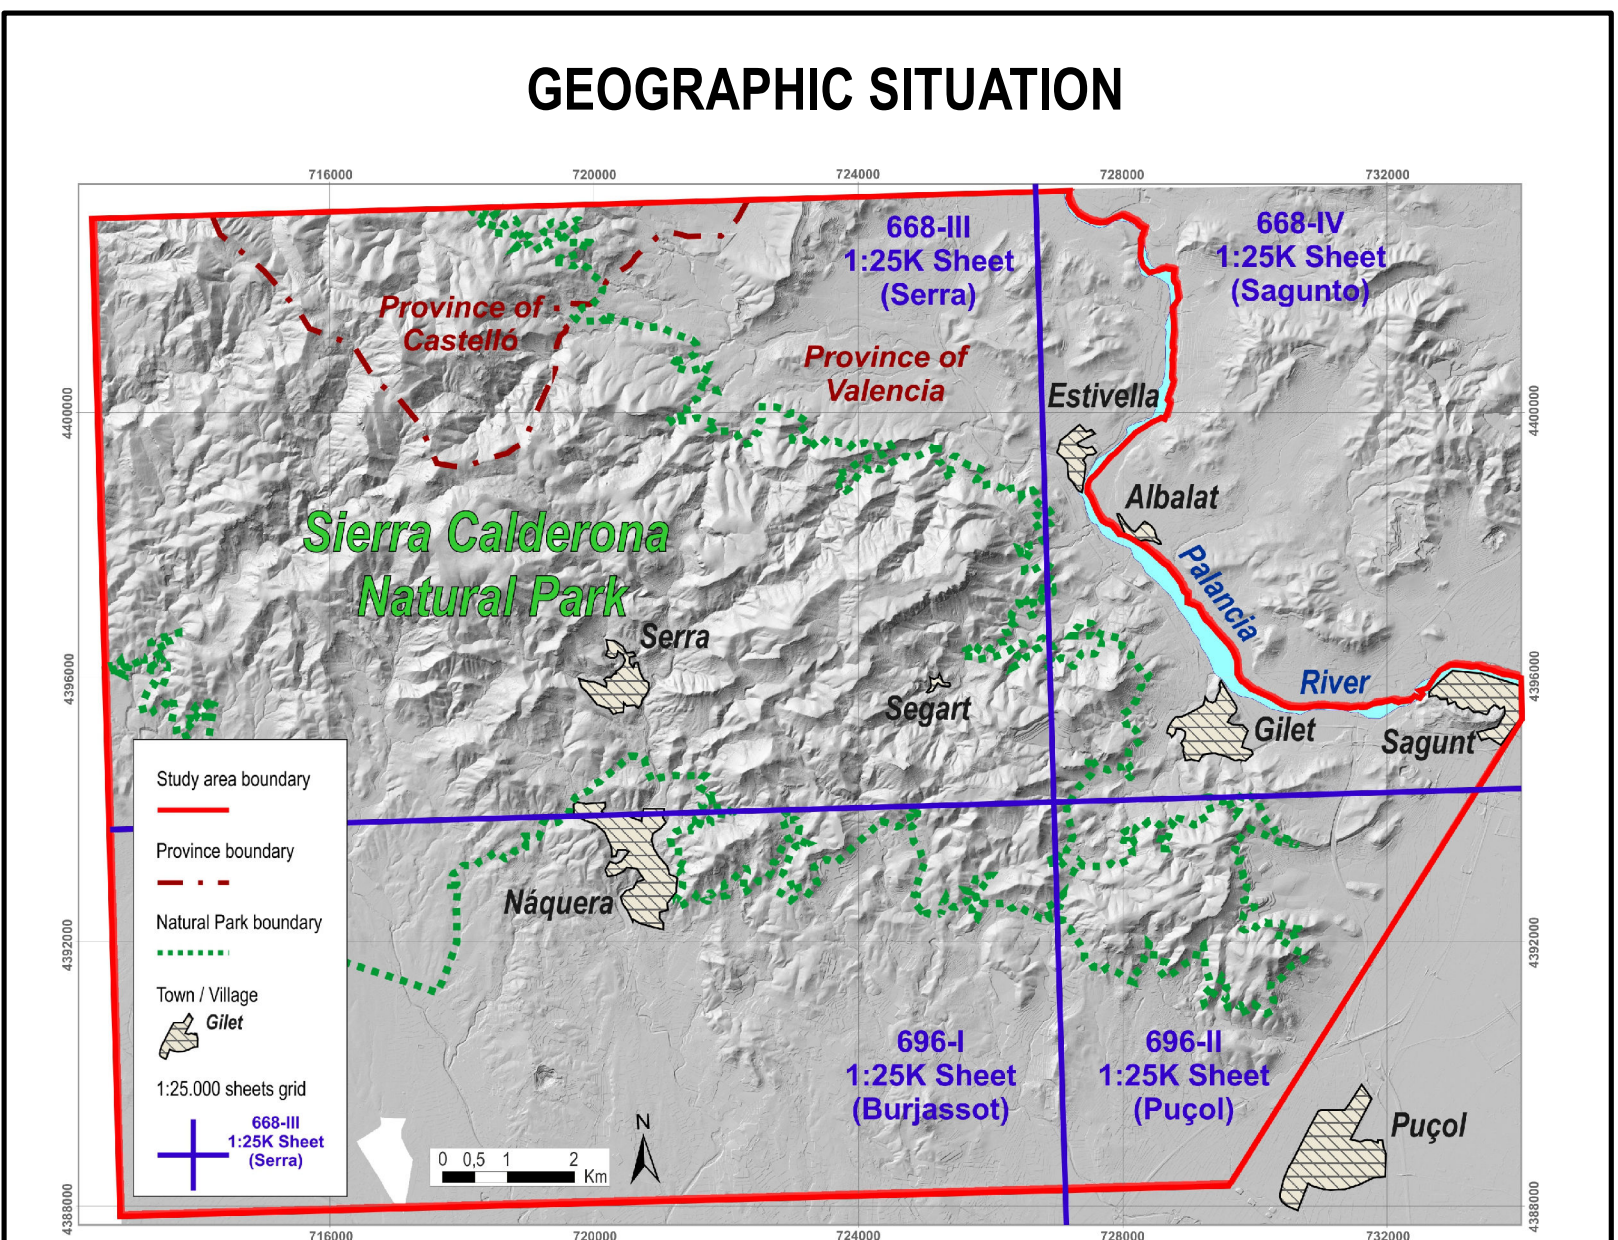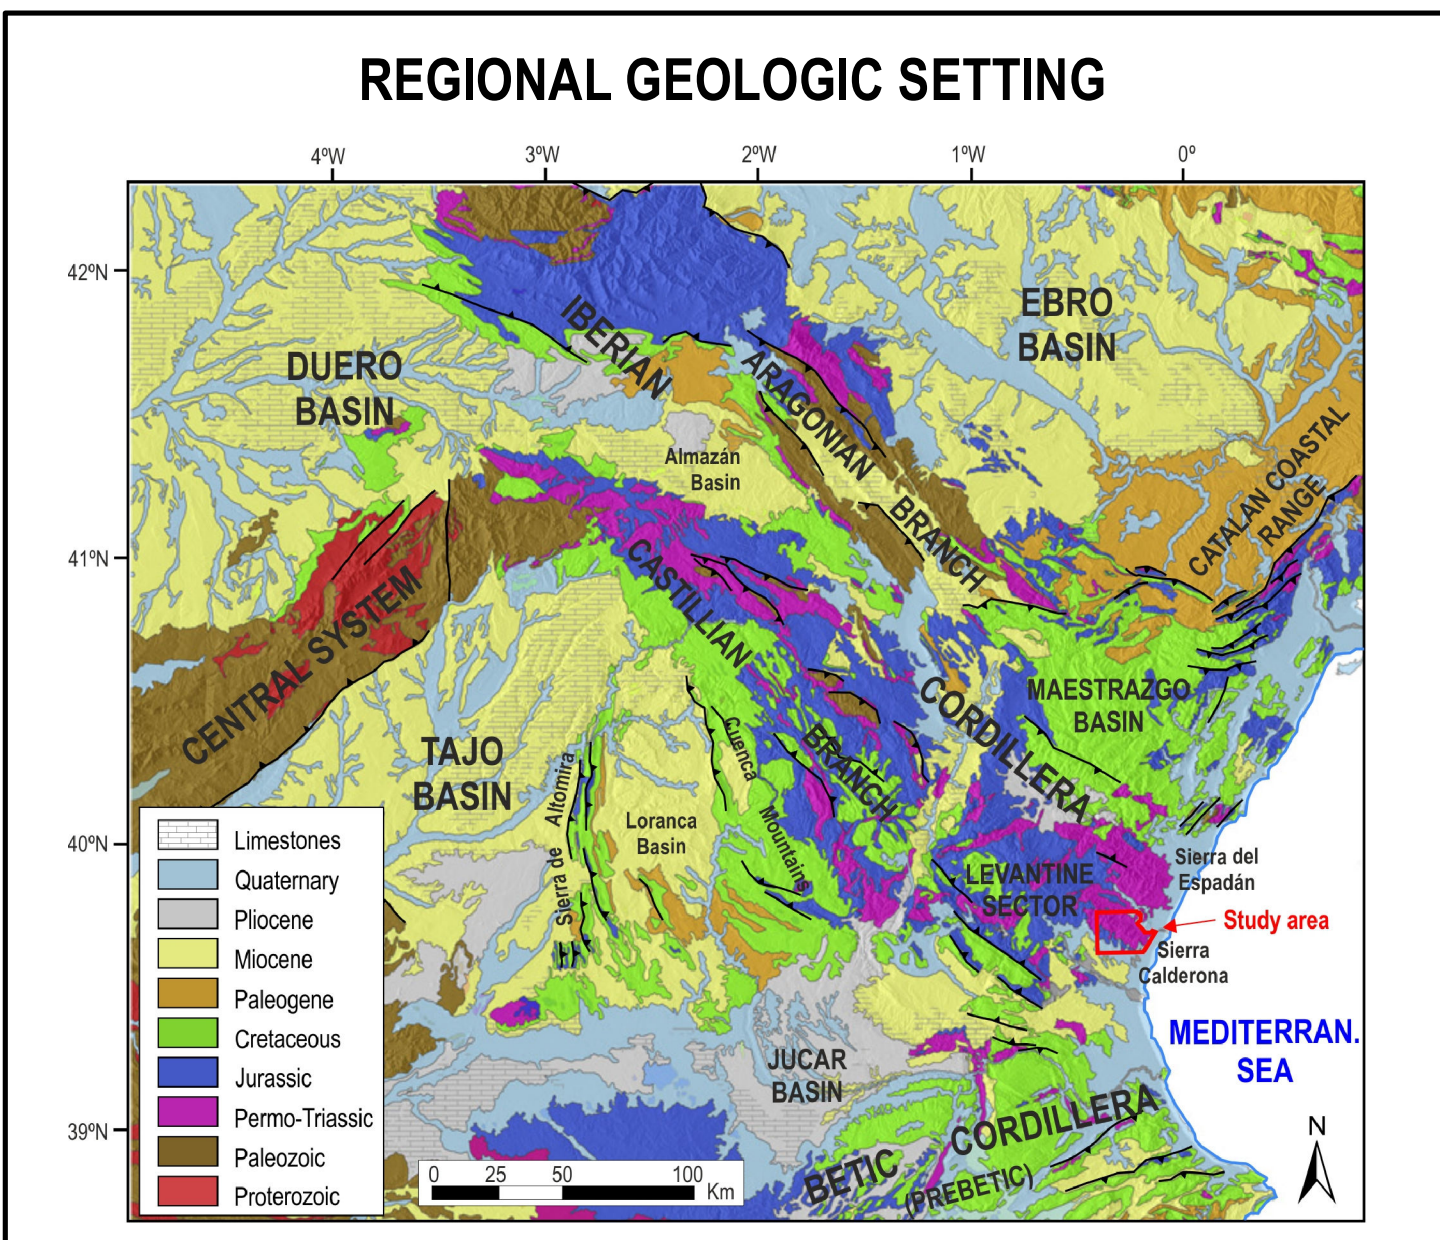

**SYMBOLY**

|                                                       |                              |
|-------------------------------------------------------|------------------------------|
| Dip, inverted dip, subhorizontal dip, subvertical dip | Deduced thrust/reverse fault |
| Normal contact                                        | Bed trace                    |
| Unconformity                                          | Anticline                    |
| Undefined tectonic contact (detachment, salt weld...) | Syncline                     |
| Fault                                                 | Overtuned syncline           |
| Deduced fault                                         | Plunging fold axis           |
| Normal fault                                          | Trace of cross section       |
| Deduced normal fault                                  | Boundary of study area       |
| Thrust/reverse fault                                  | 1:25,000 sheet grid          |
